# Supplementary material
Source: publisher figshare collection journal article supplement (https://gsajournals.figshare.com/ndownloader/files/26663585)
Supplement: Supplementary file 1 [file 26663585]

**Figure S1.** Density of SNP markers in the calibration set (334 S0 plants) in the 12-chromosome R package Synbreed (Wimmer et al., 2012)


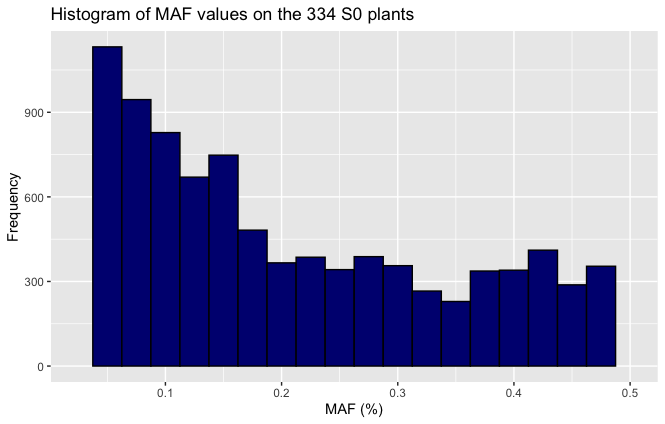


**Figure S2.** MAF distribution among the population of 334 S0 plants.


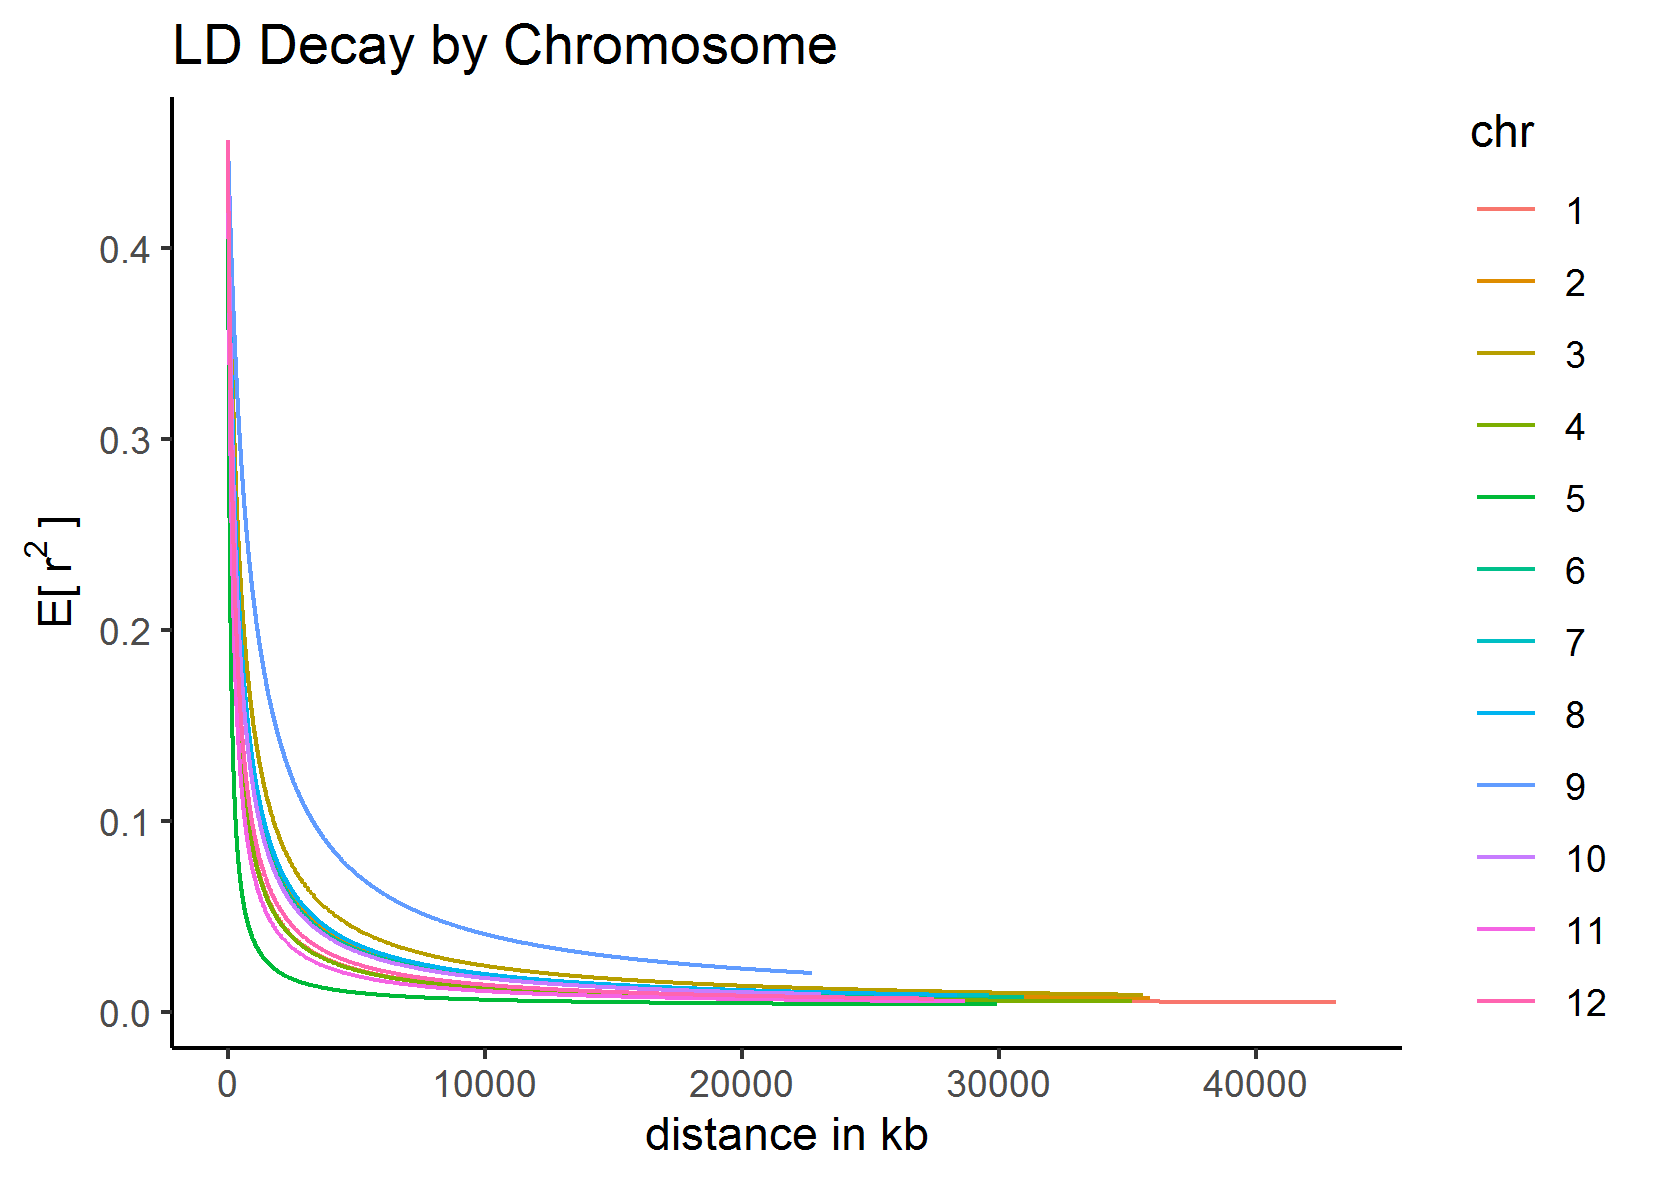


**Figure S3.** Linkage disequilibrium, measured as r2 between all pairs of markers considered in a 50 variants window (PLINK1.09). R2 values plotted against distances between markers in kb as a nonlinear regression model based on Hill and Weir’s (1988) equation.

**Figure S4.** Neighbor joining tree of Euclidean distance between the 334 S0 plants (Darwin)
